# Supplementary material
Source: publisher figshare collection journal article supplement (https://gsajournals.figshare.com/articles/dataset/_/8309342)
Supplement: Supplementary file 1 [file 1]

## Sheet: Sheet1
PRIMERS	SEQUENCE 5' - 3'	PURPOSE
M13 F	GTAAAACGACGGCCAGT	NAT and NEO cassette amplification
M13 r	CAGGAAACAGCTATGAC	NAT and NEO cassette amplification
JOHE43277	TCCACGGTGCAGATCCTC	Malassezia NAT - F
JOHE43278	CGTCCTCTCCTATGTCTG	Malassezia NAT - R
ai76	AACAGTTGCGCAGCCTGAATG	inverse PCR
ai77	AGAGGCGGTTTGCGTATTGG	inverse PCR
JOHE43279	CGTATCCAAGCTCAAGCTC	Forward-check correct recombination with pGI3
JOHE43280	GTTGGCCGATTCATTAATGC	Reverse-check correct recombination with pGI3
JOHE43281	GTCGGAGAAGCAGTCAATGC	Reverse-check correct recombination when using Malassezia NAT gene; screening candidate KO
JOHE43282	CACCAGGGTTTCCAGTCTC	Forward-check correct recombination when using Malassezia NAT gene; screening candidate KO
JOHE45201	GCGCGCCTAGGCCTCTGCAGGTCGACTCTggaccagcggaatttctcc	PDR10 5'F
JOHE45202	GAGGATCTGCACCGTGGAgaccaagaagggcaagaagg	PDR10 5'R
JOHE45203	CAGACATAGGAGAGGACGccttcattccacgtctgctt	PDR10 3'F
JOHE45204	TGATTACGAATTCTTAATTAAGATATCGAGaagtcggtcattggttggtc	PDR10 3'R
JOHE45205	cgctggccataaatatcat	PDR10 external screen F
JOHE45206	taggtcgctagatcggcagt	PDR10 external screen R
JOHE45207	acacggaaccgataatcagc	PDR10 internal screen F
JOHE45208	aggtggtggtcctgaacaag	PDR10 internal screen R
JOHE45209	GCGCGCCTAGGCCTCTGCAGGTCGACTCTTTCCCCATTCCATCTTTCAG	CDC55 5'F
JOHE45210	GAGGATCTGCACCGTGGATCACCCGTAGCGAGGTAATC	CDC55 5'R
JOHE45211	CAGACATAGGAGAGGACGGAACCCGAACAACATCGACT	CDC55 3'F
JOHE45212	TGATTACGAATTCTTAATTAAGATATCGAGTTGTGCAAGTGATCCAGGAG	CDC55 3'R
JOHE45213	TCCGCAAAATCCTCAATTTC	CDC55 external screen F
JOHE45874	GCGATGAAGAGGTCGAAGAC	CDC55 external screen R
JOHE45215	ACCTGGGGATCAGTGACAAG	CDC55 internal screen F
JOHE45216	CTCGGAGAAGAACGACTTGG	CDC55 internal screen R
JOHE46457	GCGCGCCTAGGCCTCTGCAGGTCGACTCTGGTACCGAGCTCGATATCTTAATTAACCGCGGGAATTCCGAGGAGTTCGAGGAATCTC	pGI3 recomb + MCS pH3_F
JOHE46458	gctgtattttttgtccatTACTCGTAGTAAGAAGCAAC	pH3_R-Cas9
JOHE46459	atggacaaaaaatacagc	Cas9 F
JOHE46460	ttaggcgtagtctgggacgtc	Cas9 R
JOHE46461	gacgtcccagactacgcctaaTGGAATCCAAGTGATGTGT	Cas9-f tH3
JOHE46462	GGTGGTTCGACTGTGTCGAACTAGTTTTCCGCGGAAGTCGTCGGGGCTGAATC	R-tH3-SacII-SpeI-5srRNA
JOHE46463	CCGCGGAAAACTAGTTCGACACAGTCGAACCACC	F- SacII-SpeI-5srRNA
JOHE46464	GAACTGCAGCATCCAGGAT	R-5srRNA
JOHE46465	GTTTTAGAGCTAGAAATAGCAAGTT	Common F gRNA
JOHE46466	TGATTACGAATTCTTAATTAAGATATCGAGACTAGTCCGCTCGAGTAAAACAAAAAAGCACCGAC	Common R gRNA + pGI3 recombination
JOHE46467	ATCCTGGATGCTGCAGTTCGGTGAAGGTCAGGAGCATCGGTTTTAGAGCTAGAAATAGCAAGTT	Furfur_PDR12
JOHE46468	ATCCTGGATGCTGCAGTTCGTTGTCGGTGAACTCGGATGGTTTTAGAGCTAGAAATAGCAAGTT	Furfur_CDC55
JOHE44509/GI	CTTACGTCTAACCAGTCGTC	qPCR_JEN1-F
JOHE44510	CGAACGAGTTTGGCAGAATC	qPCR_JEN1-R
JOHE44511	CCCTCATGTCCTCAACACG	qPCR_uncharacterize gene
JOHE44512	GGTTCTTGGTAGATTCTGAT	qPCR_uncharacterize gene
JOHE44515	GCCAGCTGAACTCGGACCTC	qPCR_TUB2-F
JOHE44516	GCGAGCCCTTGGCAGTCAG	qPCR_TUB2-R
